# Supplementary material for: Nanosensors Based on Structural Memory Carbon Nanodots for Ag+ Fluorescence Determination
Source: MDPI journal article supplement (doi:10.3390/nano11102687), 2021-10-12
Supplement: s1 [file s1]

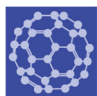

## Supplementary Materials

# Nanosensors Based on Structural Memory Carbon Nanodots for Ag<sup>+</sup> Fluorescence Determination

Xi Zhou <sup>1,2,3</sup>, Yufeng Cao <sup>1</sup>, Xinji Zhou <sup>1</sup>, Lina Xu <sup>2,3</sup>, Daihui Zhang <sup>2,3</sup>, Chunpeng Wang <sup>2,3</sup>, Fuxiang Chu <sup>2,3,\*</sup> and Tao Qian <sup>1,\*</sup>

<sup>1</sup> School of Chemistry and Chemical Engineering, Nantong University, Nantong 226019, China; zhouxi@ntu.edu.cn (X.Z.); yufengcao@ntu.edu.cn (Y.C.); 2839376833@qq.com (X.Z.)

<sup>2</sup> Institute of Chemical Industry of Forestry Products, Chinese Academy of Forestry, Nanjing 210042, China; xulina072@163.com (L.X.); zdh0824@163.com (D.Z.); wangcpg@163.com (C.W.)

<sup>3</sup> Co-Innovation Center of Efficient Processing and Utilization of Forest Resources, Nanjing Forestry University, Nanjing 210037, China

\*Correspondence: chufxg@163.com (F.C.); qiantao@ntu.edu.com (T.Q.)

**Cytotoxicity test:** Human uterine cancer cell (HeLa) was seeded into 96-well plates with Dulbecco's modified Eagle's medium (DMEM) for 24 h at a density of 10<sup>4</sup> cells/150 µL in an incubator (37 °C, 5% CO<sub>2</sub>). And the culture medium was replaced DMEM containing C<sub>SM</sub>-dots of different concentrations (0, 0.05, 0.1, 0.25, 0.5, 0.75 mg/mL) for another 24 h. Then, the cells were washed by 20 mL PBS buffer (pH 7.4) and incubated with MTT solution (5 mg/mL) for 4 h. After that, the culture medium was removed, followed by the addition of 150 µL DMSO and shaken for 10 min at room temperature. The optical density (OD) was measured by a microplate reader (ELx800, Biotek, USA) at 490 nm. The cell viability was estimated according to the following equation:

$$\text{Cell viability (\%)} = (\text{OD}_{\text{treated}} / \text{OD}_{\text{control}}) \times 100\%$$

where OD<sub>treated</sub> was obtained in the presence of LGQDs, and OD<sub>control</sub> was obtained in the absence of C<sub>SM</sub>-dots.

**Cellular imaging analysis:** The HeLa was first cultured in DMEM containing 10% fetal bovine serum (FBS) and 1% penicillin/streptomycin at 37 °C in 5% CO<sub>2</sub> for 12 h, followed by incubation with C<sub>SM</sub>-dots (0.5 mg mL<sup>-1</sup>) for another 6 h. Then, the cells were washed with Dulbecco's phosphate buffer saline (DPBS) three times (1.0 mL each) to remove the C<sub>SM</sub>-dots. The HeLa cells were harvest by fixed with 4% paraformaldehyde solution in DPBS at 4 °C for 30 min. The cellular imaging of the treated cells was performed on a Nikon Eclipse 90i microscope equipped with the Cool SNaP HQ2 CCD camera (Photometrics, AZ).

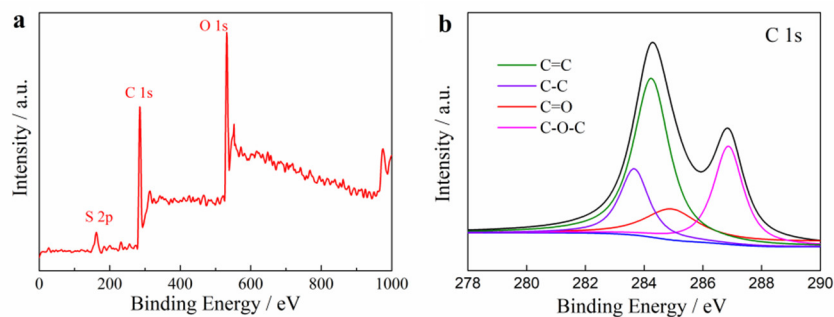

**Figure S1.** (a) The XPS spectra of lignin. (b) The high-resolution XPS spectra of C 1s in lignin.

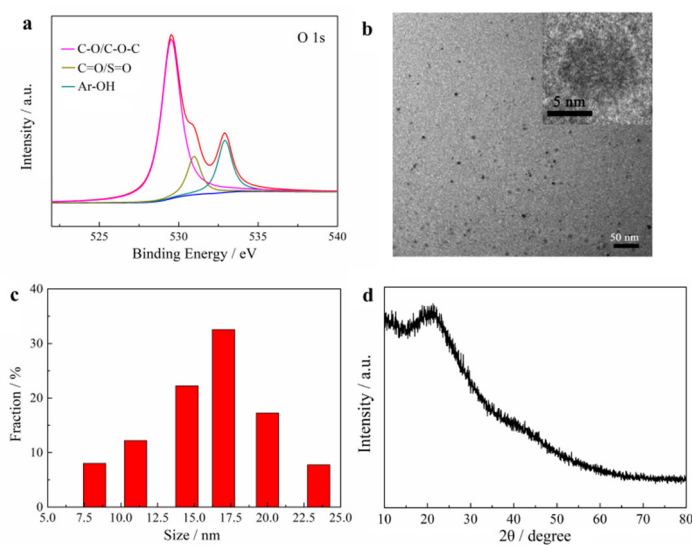

**Figure S2.** (a) The high-resolution XPS spectra of O 1s in C<sub>SM</sub>-dots. (b) TEM image of C<sub>SM</sub>-dots (The inset is HRTEM image of C<sub>SM</sub>-dots). (c) Size distribution of C<sub>SM</sub>-dots. (d) XRD pattern of C<sub>SM</sub>-dots.

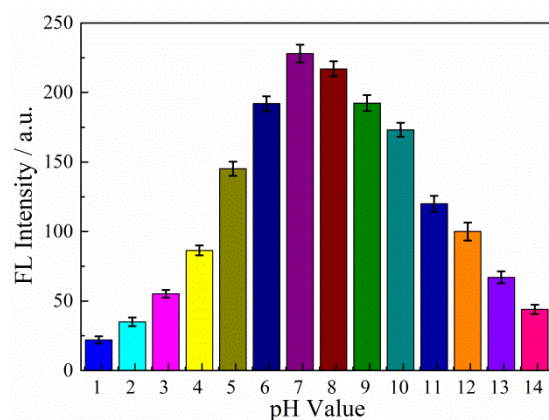

**Figure S3.** The effect of different pH value on the FL performance of C<sub>SM</sub>-dots.

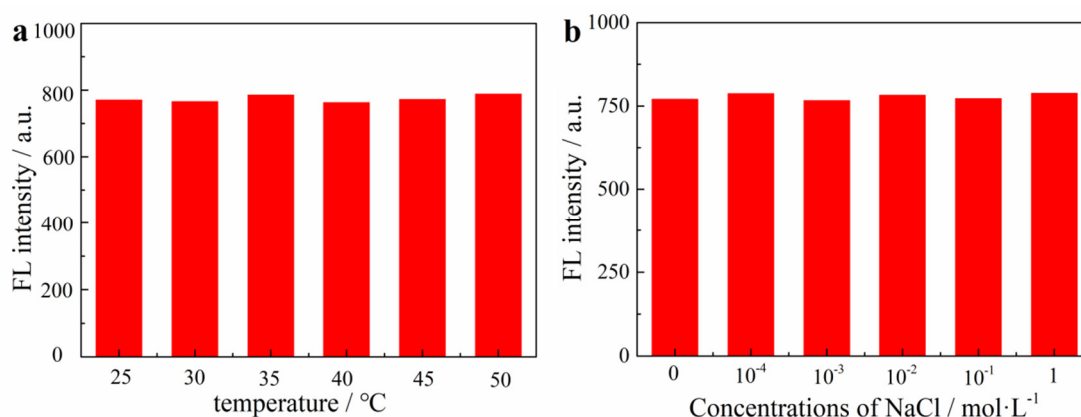

**Figure S4.** FL intensity variation of the C<sub>SM</sub>-dots as a function of temperature (a) and concentrations of NaCl (b).

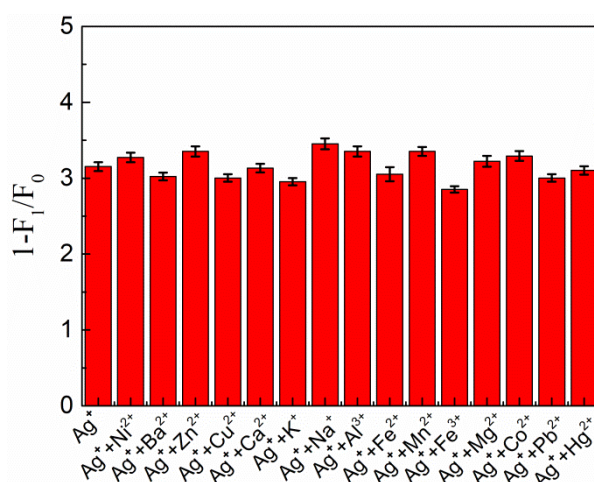

**Figure S5.** The selectivity for the detection of Ag<sup>+</sup> by C<sub>SM</sub>-dots in the presence of other metal ions. The concentrations of the interference ions were 4000  $\mu$ M, which is ten time higher than that of Ag<sup>+</sup>.

**Table S1.** Comparison of the reported probe for Ag<sup>+</sup> determination.

| Precursor                      | Linear range ( $\mu$ M) | Detect limit (nM) | Ref.      |
|--------------------------------|-------------------------|-------------------|-----------|
| Pyrrolo[2,1-a]isoquinoline     | 0-30                    | 600               | [1]       |
| 1,2,4-Triaminobenzene          | 0-30                    | 660               | [2]       |
| Polyurethane foam              | 0-6                     | 2800              | [3]       |
| azidoimidazole                 | 0-20                    | 480               | [4]       |
| Bis(5,6-dimethylbenzimidazole) | 0-100                   | 423               | [5]       |
| Lignin                         | 5-290                   | 500               | This work |

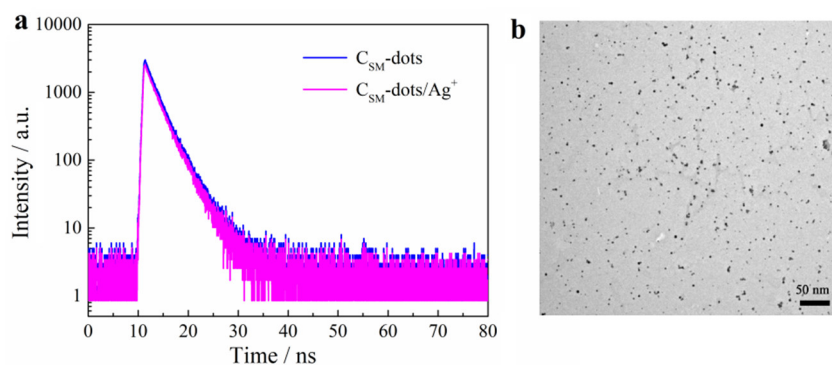

**Figure S6.** (a) FL decay spectra of C<sub>SM</sub>-dots and C<sub>SM</sub>-dots/Ag<sup>+</sup> system. (b) The TEM image of C<sub>SM</sub>-dots /Ag<sup>+</sup> composites.

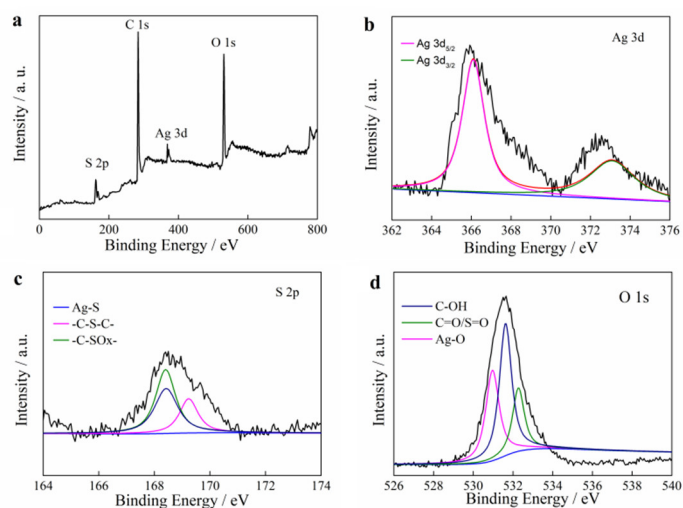

**Figure S7.** XPS spectrum of C<sub>SM</sub>-dots/ Ag NPs (a). The high-resolution XPS spectra of Ag 3d (b), S 2p (c) and O 1s (d) in C<sub>SM</sub>-dots/ Ag NPs.

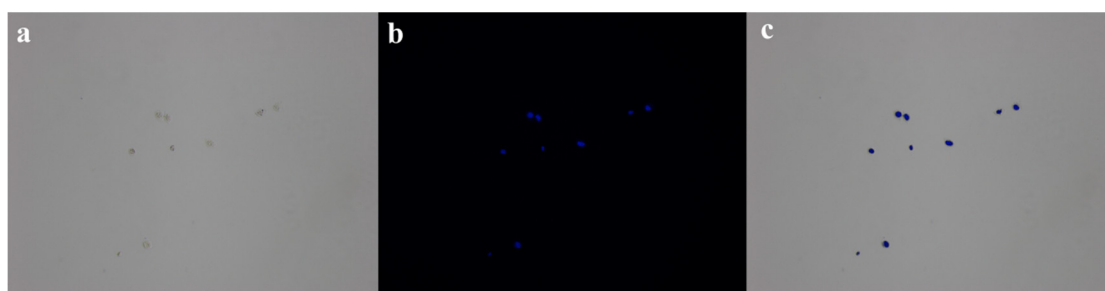

**Figure S8.** The fluorescence microscopy images of HeLa cells treated with C<sub>SM</sub>-dots, (a) the bright-field images, (b) the fluorescent images, (c) the merged images of (a) and (b).

## References

1. Jiang, Y.L.; Kong, W.W.; Shen, Y.M.; Wang, B.X. Two fluorescence turn-on chemosensors based on pyrrolo[2,1-a]isoquinoline for detection of  $\text{Ag}^+$  in aqueous solution. *Tetrahedron* **2015**, *71*, 5584, doi: 10.1016/j.tet.2015.06.055.
2. Lu, Z.F.; Su, T.T.; Feng, Y.T.; Jiang, S.Q.; Zhou, C.X.; Hong, P.Z.; Sun, S.L.; Li, C.Y. Potential application of nitrogen-doped carbon quantum dots synthesized by a solvothermal method for detecting silver ions in food packaging. *Int. J. Environ. Res. Public Health* **2019**, *16*, 2518, doi: 10.3390/ijerph16142518.
3. Shen, C.; Ge, S.Y.; Pang, Y.Y.; Xi, F.N.; Liu, J.Y.; Dong, X.P.; Chen, P. Facile and scalable preparation of highly luminescent N, S co-doped graphene quantum dots and their application for parallel detection of multiple metal ions. *J. Mater. Chem. B* **2017**, *5*, 6593, doi: 10.1039/C7TB00506G.
4. Wu, Z.S.; Feng, M.K.; Chen, X.X.; Tang, X.J. N-dots as a photoluminescent probe for the rapid and selective detection of  $\text{Hg}^{2+}$  and  $\text{Ag}^+$  in aqueous solution. *J. Mater. Chem. B* **2016**, *4*, 2086, doi: 10.1039/C5TB02628H.
5. Wu, Y.C.; Jiang, K.; Luo, S.H.; Cao, L.; Wu, H.Q.; Wang, Z.Y. Novel dual-functional fluorescent sensors based on bis(5,6-dimethylbenzimidazole) derivatives for distinguishing of  $\text{Ag}^+$  and  $\text{Fe}^{3+}$  in semi-aqueous medium. *Spectrochim. Acta A* **2019**, *206*, 632, doi: 10.1016/j.saa.2018.05.069.
